# Supplementary material for: Development and Evaluation of a Component Level Implementation Fidelity Rating System for the GenerationPMTO Intervention
Source: PubMed Central journal article supplement (PMC8032561; doi:10.1007/s11121-020-01177-5), 2020-10-25
Supplement: 11121_2020_1177_MOESM2_ESM.pdf [file 11121_2020_1177_MOESM2_ESM.pdf]

Supplemental File B

*Item Performance Statistics*

| Item                             | Item Type    | Brief Description                                                         | Range | <i>M</i> | <i>SD</i> | ICC  | Lower CI | Upper CI |
|----------------------------------|--------------|---------------------------------------------------------------------------|-------|----------|-----------|------|----------|----------|
| <b>Clear Directions Scale</b>    |              |                                                                           |       |          |           |      |          |          |
| CD1                              | Verbal Teach | Clear directions are a tool for increasing cooperation                    | 6     | 0.66     | 1.13      | 0.83 | 0.70     | 0.91     |
| CD2                              | Verbal Teach | Cooperation target is 70% of the time, within 10 seconds                  | 5.5   | 0.47     | 1.09      | 0.92 | 0.85     | 0.96     |
| CD3                              | Verbal Teach | Characteristics of unclear directions                                     | 6     | 0.47     | 1.12      | 0.78 | 0.61     | 0.88     |
| CD4                              | Verbal Teach | Characteristics of clear directions                                       | 6     | 0.80     | 1.49      | 0.89 | 0.79     | 0.94     |
| CD5                              | Demonstrate  | Leader demonstrates clear directions material                             | 6     | 0.61     | 1.23      | 0.86 | 0.74     | 0.93     |
| CD6                              | Facilitate   | Leader facilitates in-session application of clear directions material    | 6     | 0.87     | 1.80      | 0.89 | 0.80     | 0.94     |
| CD7                              | Assign HP    | Leader assigns home practice of clear directions material                 | 6     | 0.45     | 1.12      | 0.94 | 0.88     | 0.97     |
| CD8                              | Review HP    | Leader reviews home practice of clear directions material                 | 6     | 0.50     | 1.45      | 0.96 | 0.93     | 0.98     |
| <b>Skill Encouragement Scale</b> |              |                                                                           |       |          |           |      |          |          |
| SE1                              | Verbal Teach | Skill encouragement is a tool for teaching desired behaviors              | 3     | 0.55     | 0.81      | 0.67 | 0.45     | 0.82     |
| SE2                              | Verbal Teach | Encourage behaviors with contingent positive reinforcement                | 6     | 1.30     | 1.37      | 0.66 | 0.43     | 0.81     |
| SE3                              | Verbal Teach | Break complex behaviors into smaller steps                                | 6     | 0.58     | 1.07      | 0.81 | 0.65     | 0.90     |
| SE4                              | Verbal Teach | Rationale for incentive charts                                            | 6     | 0.89     | 1.19      | 0.68 | 0.46     | 0.82     |
| SE5                              | Verbal Teach | Instructions for incentive charts                                         | 6     | 0.93     | 1.47      | 0.87 | 0.76     | 0.93     |
| SE6                              | Demonstrate  | Leader demonstrates skill encouragement material                          | 6     | 0.52     | 1.14      | 0.89 | 0.80     | 0.94     |
| SE7                              | Facilitate   | Leader facilitates in-session application of skill encouragement material | 6     | 0.49     | 1.20      | 0.87 | 0.76     | 0.93     |
| SE8                              | Assign HP    | Leader assigns home practice of skill encouragement material              | 4     | 0.60     | 0.89      | 0.85 | 0.73     | 0.92     |
| SE9                              | Review HP    | Leader reviews home practice of skill encouragement material              | 6     | 1.39     | 1.92      | 0.97 | 0.95     | 0.99     |
| <b>Emotion Regulation Scale</b>  |              |                                                                           |       |          |           |      |          |          |
| ER1                              | Verbal Teach | Emotion regulation is a tool for enhancing effective parenting            | 6     | 0.57     | 0.94      | 0.42 | 0.03     | 0.70     |
| ER2                              | Verbal Teach | Emotions can have a powerful effect on others                             | 6     | 0.60     | 0.94      | 0.53 | 0.25     | 0.73     |
| ER3                              | Verbal Teach | It is important to be able to identify emotions                           | 4.5   | 0.61     | 1.10      | 0.90 | 0.80     | 0.95     |
| ER4                              | Verbal Teach | Characteristics of different emotions                                     | 5     | 0.30     | 0.79      | 0.56 | 0.29     | 0.75     |
| ER5                              | Verbal Teach | It is possible to regulate emotions                                       | 6     | 0.50     | 0.92      | 0.74 | 0.55     | 0.86     |
| ER6                              | Verbal Teach | Techniques for regulating emotions                                        | 6     | 0.75     | 1.41      | 0.87 | 0.76     | 0.93     |
| ER7                              | Demonstrate  | Leader demonstrates emotion regulation material                           | 6     | 0.40     | 0.93      | 0.71 | 0.50     | 0.84     |

|      |            |                                                                          |     |      |      |      |      |      |
|------|------------|--------------------------------------------------------------------------|-----|------|------|------|------|------|
| ER8  | Facilitate | Leader facilitates in-session application of emotion regulation material | 6   | 1.31 | 2.24 | 0.97 | 0.95 | 0.99 |
| ER9  | Assign HP  | Leader assigns home practice of emotion regulation material              | 4.5 | 0.56 | 1.08 | 0.86 | 0.74 | 0.93 |
| ER10 | Review HP  | Leader reviews home practice of emotion regulation material              | 6   | 0.90 | 1.90 | 0.95 | 0.90 | 0.97 |

#### Limit Setting Scale

|      |              |                                                                     |   |      |      |      |      |      |
|------|--------------|---------------------------------------------------------------------|---|------|------|------|------|------|
| LS1  | Verbal Teach | Limit setting is a tool for decreasing problem behaviors            | 6 | 0.76 | 1.18 | 0.79 | 0.63 | 0.89 |
| LS2  | Verbal Teach | Apply mild, negative consequences                                   | 6 | 1.05 | 1.63 | 0.75 | 0.51 | 0.88 |
| LS3  | Verbal Teach | Rationale for time out                                              | 6 | 0.58 | 1.22 | 0.89 | 0.79 | 0.94 |
| LS4  | Verbal Teach | Instructions for time out                                           | 6 | 0.62 | 1.45 | 0.91 | 0.83 | 0.95 |
| LS5  | Verbal Teach | Rationale for privilege removal                                     | 5 | 0.33 | .81  | 0.53 | 0.25 | 0.73 |
| LS6  | Verbal Teach | Instructions for privilege removal                                  | 5 | 0.46 | 1.10 | 0.67 | 0.44 | 0.82 |
| LS7  | Verbal Teach | Other limit setting tools                                           | 4 | 0.22 | .67  | 0.79 | 0.63 | 0.89 |
| LS8  | Demonstrate  | Leader demonstrates limit setting material                          | 6 | 0.47 | 1.17 | 0.47 | 0.17 | 0.69 |
| LS9  | Facilitate   | Leader facilitates in-session application of limit setting material | 6 | 0.49 | 1.32 | 0.92 | 0.84 | 0.96 |
| LS10 | Assign HP    | Leader assigns home practice of limit setting material              | 5 | 0.40 | .96  | 0.88 | 0.78 | 0.94 |
| LS11 | Review HP    | Leader reviews home practice of limit setting material              | 6 | 0.89 | 1.85 | 0.98 | 0.97 | 0.99 |

#### Effective Communication Scale

|     |              |                                                                               |   |      |      |      |      |      |
|-----|--------------|-------------------------------------------------------------------------------|---|------|------|------|------|------|
| EC1 | Verbal Teach | Effective communication is a tool for exchanging information                  | 4 | 0.34 | .65  | 0.39 | 0.08 | 0.64 |
| EC2 | Verbal Teach | Characteristics of effective communication                                    | 5 | 0.44 | .95  | 0.58 | 0.24 | 0.79 |
| EC3 | Verbal Teach | Characteristics of active listening                                           | 6 | 0.64 | 1.45 | 0.93 | 0.86 | 0.96 |
| EC4 | Verbal Teach | Active listening helps parents monitor children                               | 5 | 0.52 | 1.15 | 0.84 | 0.66 | 0.93 |
| EC5 | Demonstrate  | Leader demonstrates effective communication material                          | 6 | 0.28 | 0.85 | 0.34 | 0.01 | 0.60 |
| EC6 | Facilitate   | Leader facilitates in-session application of effective communication material | 6 | 0.53 | 1.26 | 0.82 | 0.68 | 0.91 |
| EC7 | Assign HP    | Leader assigns home practice of effective communication material              | 5 | 0.52 | 1.12 | 0.92 | 0.84 | 0.96 |
| EC8 | Review HP    | Leader reviews home practice of effective communication material              | 6 | 0.70 | 1.52 | 0.87 | 0.76 | 0.93 |

#### Problem Solving Scale

|     |              |                                                                                      |     |      |      |      |      |      |
|-----|--------------|--------------------------------------------------------------------------------------|-----|------|------|------|------|------|
| PS1 | Verbal Teach | Problem solving is a tool for addressing problems and/or achieving goals as a family | 6   | 0.43 | .88  | 0.56 | 0.29 | 0.75 |
| PS2 | Verbal Teach | Rationale for specific problem solving procedure                                     | 6   | 0.55 | 1.37 | 0.89 | 0.80 | 0.94 |
| PS3 | Verbal Teach | Instructions for specific problem solving procedure                                  | 6   | 0.84 | 1.76 | 0.94 | 0.89 | 0.97 |
| PS4 | Verbal Teach | Rationale for family meetings                                                        | 4.5 | 0.26 | 0.76 | 0.92 | 0.86 | 0.96 |
| PS5 | Verbal Teach | Instructions for family meetings                                                     | 5   | 0.25 | 0.82 | 0.90 | 0.81 | 0.95 |
| PS6 | Demonstrate  | Leader demonstrates problem solving material                                         | 5   | 0.35 | 1.05 | 0.85 | 0.73 | 0.92 |

|                                   |              |                                                                                              |   |      |      |       |       |      |
|-----------------------------------|--------------|----------------------------------------------------------------------------------------------|---|------|------|-------|-------|------|
| PS7                               | Facilitate   | Leader facilitates in-session application of problem solving material                        | 6 | 0.69 | 1.68 | 0.98  | 0.97  | 0.99 |
| PS8                               | Assign HP    | Leader assigns home practice of problem solving material                                     | 5 | 0.45 | 1.08 | 0.93  | 0.87  | 0.97 |
| PS9                               | Review HP    | Leader reviews home practice of problem solving material                                     | 6 | 0.62 | 1.62 | 0.99  | 0.98  | 0.99 |
| <b>Monitoring Scale</b>           |              |                                                                                              |   |      |      |       |       |      |
| MO1                               | Verbal Teach | Monitoring is a tool for keeping children safe and/or out of trouble                         | 4 | 0.32 | 0.79 | 0.88  | 0.78  | 0.94 |
| MO2                               | Verbal Teach | Children need different levels of monitoring                                                 | 4 | 0.19 | 0.64 | 0.80  | 0.64  | 0.89 |
| MO3                               | Verbal Teach | Aspects of monitoring inside the home                                                        | 4 | 0.07 | 0.38 | -0.01 | -0.34 | 0.31 |
| MO4                               | Verbal Teach | Aspects of monitoring outside the home                                                       | 6 | 0.46 | 1.22 | 0.84  | 0.71  | 0.92 |
| MO5                               | Verbal Teach | Involving children in skill-building activities                                              | 4 | 0.15 | 0.58 | 0.86  | 0.74  | 0.92 |
| MO6                               | Verbal Teach | Protecting children while in care of others                                                  | 6 | 0.28 | 1.04 | 0.87  | 0.76  | 0.93 |
| MO7                               | Demonstrate  | Leader demonstrates monitoring material                                                      | 3 | 0.07 | 0.36 | -     | -     | -    |
| MO8                               | Facilitate   | Leader facilitates in-session application of monitoring material                             | 6 | 0.36 | 1.12 | 0.72  | 0.52  | 0.85 |
| MO9                               | Assign HP    | Leader assigns home practice of monitoring material                                          | 6 | 0.32 | 1.23 | 0.97  | 0.94  | 0.98 |
| MO10                              | Review HP    | Leader reviews home practice of monitoring material                                          | 6 | 0.28 | 1.10 | 0.86  | 0.74  | 0.92 |
| <b>Positive Involvement Scale</b> |              |                                                                                              |   |      |      |       |       |      |
| PI1                               | Verbal Teach | Clear directions support the parent-child relationship                                       | 3 | 0.21 | 0.62 | 0.37  | 0.05  | 0.62 |
| PI2                               | Verbal Teach | Skill encouragement is a positive experience for child/strengthens parent-child relationship | 6 | 0.55 | 0.94 | 0.41  | 0.10  | 0.65 |
| PI3                               | Verbal Teach | Emotions can interfere with parent-child relationship                                        | 6 | 0.51 | 0.94 | 0.73  | 0.54  | 0.85 |
| PI4                               | Verbal Teach | Limit setting can be accomplished without harming the parent-child relationship              | 6 | 0.66 | 1.27 | 0.40  | 0.09  | 0.64 |
| PI5                               | Verbal Teach | Effective communication nourishes the parent-child relationship                              | 4 | 0.33 | 0.76 | 0.84  | 0.70  | 0.91 |
| PI6                               | Verbal Teach | Problem solving prevents conflict in the parent-child relationship                           | 3 | 0.21 | 0.60 | 0.12  | -0.21 | 0.43 |
| PI7                               | Verbal Teach | Monitoring can benefit the parent-child relationship                                         | 3 | 0.09 | 0.38 | 0.66  | 0.43  | 0.81 |
| PI8                               | Verbal Teach | Showing child affection                                                                      | 3 | 0.10 | 0.34 | -0.06 | -0.38 | 0.27 |
| PI9                               | Verbal Teach | Spending time with child                                                                     | 2 | 0.22 | 0.45 | 0.26  | -0.07 | 0.54 |
| PI10                              | Verbal Teach | Being involved in child's school life                                                        | 3 | 0.26 | 0.64 | 0.51  | 0.15  | 0.76 |
| PI11                              | Verbal Teach | Positive involvement not otherwise specified                                                 | 2 | 0.26 | 0.53 | -0.05 | -0.37 | 0.28 |

*Note:* HP = home practice.
