# Supplementary material for: Development and Evaluation of a Component Level Implementation Fidelity Rating System for the GenerationPMTO Intervention
Source: PubMed Central journal article supplement (PMC8032561; doi:10.1007/s11121-020-01177-5), 2020-10-25
Supplement: 11121_2020_1177_MOESM3_ESM.pdf [file 11121_2020_1177_MOESM3_ESM.pdf]

Supplemental File C

*Correlations for Intervention Group Component Scores and Post-Intervention Observed Parenting Practices*

| CLIFRS<br>Component Scores | Post-Intervention Observed Parenting Practices |                                |        |
|----------------------------|------------------------------------------------|--------------------------------|--------|
|                            | Time 1                                         | Time 2                         | Time 3 |
| Clear Directions           | .00                                            | Negative Reciprocity<br>-.21*  | .04    |
| Skill Encouragement        | .04                                            | Skill Encouragement<br>.16*    | .10    |
| Emotion Regulation         | .15*                                           | Emotion Regulation<br>.19*     | .02    |
| Limit Setting              | -.19*                                          | Inept Discipline<br>-.06       | -.04   |
| Effective Communication    | .15*                                           | Effective Communication<br>.10 | -.04   |
| Problem Solving            | .13                                            | Problem Solving<br>.12         | .18*   |
| Monitoring                 | .00                                            | Monitoring<br>.18*             | -.10   |

*Note.* Time 1 = 6 months post-baseline, Time 2 = 12 months post-baseline, Time 3 = 30 months post-baseline. These timepoints were selected from among five assessment occasions because they allowed for the examination of predictive validity at termination, at the first follow-up assessment, and at the most distal follow-up. Observation-based items from structured interaction tasks were used to derive variables for skill encouragement (e.g., *Mom broke down tasks as necessary, Mom provided reinforcement for on task behavior*); emotion regulation (e.g., *Mom expresses anger/hostility while disciplining, Mom: Openly angry/irritable/hostile - - Composed/calm/pleasant*), and effective communication (e.g., *Mom was positively responsive to child questions, Mom showed empathy, support*). Monitoring was calculated as mean of 1 observed item (i.e., *Mom knows what child doing on day to day basis*) and 3 items from structured interview (e.g., *Skillful in supervising child carefully during family task, Keeps close track of youngster's behavior outside of lab*). Variables for negative reciprocity, inept discipline, and problem solving were based on prior GenPMTO studies (e.g., DeGarmo et al., 2004). \* $p < .05$  (1-tailed).
